# Supplementary material for: A kinome-wide CRISPR screen identifies CK1α as a novel target to overcome enzalutamide resistance of prostate cancer
Source: Research Square preprint supplement (doi:10.21203/rs.3.rs-1450886/v1), 2022-05-18
Supplement: Supplementary file 3 [file 117dff772816b3350c8ece8c.xlsx]

## Sheet: Sheet1
table S3
CK1α.negative.signature
ARRB2
TMSB10
SEPTIN3
BOLA3-AS1
SEPTIN11
ANP32E
MNS1
DMC1
C20orf27
WDR34
MCUB
GAREM2
ZCRB1
CORO2A
FABP5
TUBB
PLIN2
YWHAQ
HNRNPR
BCL2
ATP11C
SF3B6
AFAP1L1
FANCC
L2HGDH
COLEC11
TCF4
GFI1
PBX1
MAD2L1
ALYREF
FAM189B
ASAP2
SSRP1
VMP1
ADCY3
DDX39A
DIXDC1
SCRN1
SET
OSBPL3
RANBP1
SPIDR
RNF150
FOXRED1
SLC16A2
TYMS
DNA2
BCL6
TXNL4A
SHISA8
ENOPH1
WNT10B
SLC25A15
FH
HDDC2
MDC1
PFAS
PKN3
HMGN2
PNMA2
HNRNPA2B1
PPP1R14B
ANKH
NAGLU
NIPSNAP2
CMC2
LBX2
CEMIP
MOCOS
NT5DC2
CAMK4
SLC29A1
SBK1
PRPH
MBNL3
SLC1A3
CBX3
KDM1B
PIK3R1
NMU
NKILA
RUFY3
NUP205
POLD1
PTMAP5
CYB5A
TMTC1
CALM1
TCOF1
KCNS3
HMGB1
PSPH
DARS2
E2F8
STT3A
TOPBP1
GPR180
DPYSL2
GPR162
RFC3
NSD2
ACTL6A
LRRC8C
TMEM45A
PCMT1
HMGB1P5
SOD3
RTN3
SKP2
FAM102B
CCHCR1
RAI14
SNRPA
CCM2
PLEKHG2
ISOC2
SLC47A1
SLC1A5
NAGA
HSPA4L
CENPO
KHK
WIPF3
TUBA1B
POLA1
ADAMTS19
CNRIP1
SNRPD1
PTK7
SAMD1
DPYSL5
PYCR1
TUB
CISD2
CCKBR
FCHSD2
MRPL17
H2AFZ
ILF3
RFC4
ANXA5
HMGB1P6
DHX9
NDUFB10
CHCHD3
HMGN5
ITGB1BP1
BACE1
ATAD2
SLC5A5
FMNL3
AC138904.1
TFDP1
CHST9
NUP160
POLE2
CAD
SRSF1
IAH1
TUBG1
MLST8
FBL
STOML2
LBX2-AS1
PPAT
CMBL
AKAP5
WWTR1
CXXC4
NES
KLK1
PFN1
TXN
FKBP9
ADAM22
TRIM59
HIP1
C18orf54
RECQL4
ANP32B
E2F3
NDC1
MAD2L2
TRAP1
DPYSL3
TNNT1
GPLD1
