# Supplementary material for: A kinome-wide CRISPR screen identifies CK1α as a novel target to overcome enzalutamide resistance of prostate cancer
Source: Research Square preprint supplement (doi:10.21203/rs.3.rs-1450886/v1), 2022-05-18
Supplement: Supplementary file 4 [file 5c6621bed023d536efbfce2d.xlsx]

## Sheet: Sheet1
Table 1
Rank	Gene	Beta_diff
1	CSNK1A1	-0.349246
2	MTOR	-0.346009
3	PLK1	-0.332956
4	ADCK4	-0.296117
5	TAF1	-0.293575
6	BRAF	-0.268857
7	TSSK3	-0.254053
8	PGK1	-0.24494
9	IGF1R	-0.244637
10	LRPPRC	-0.2405
11	PRKRA	-0.239978
12	LCK	-0.232578
13	NUP62	-0.225477
14	GUCY2F	-0.21308
15	DYRK1A	-0.210458
16	DYRK1B	-0.203097
17	PFKFB3	-0.200961
18	AURKA	-0.199957
19	CDK6	-0.198373
20	PHKG1	-0.192678
21	NTRK3	-0.189434
22	SMG1	-0.188798
23	PKM	-0.18754
24	CSK	-0.178109
25	NAGK	-0.176546
26	LRRK1	-0.16741
27	TWF2	-0.167049
28	PASK	-0.165251
29	AKT1	-0.163143
30	MKNK1	-0.16086
31	TNNI3K	-0.160173
32	TTN	-0.157466
33	CHEK1	-0.157193
34	PXK	-0.155525
35	ANKK1	-0.151661
36	FLT1	-0.149922
37	RIOK2	-0.14854
38	GRK7	-0.148449
39	COL4A3BP	-0.142473
40	TTBK2	-0.142166
41	TAOK2	-0.141949
42	STK24	-0.139523
43	NPR1	-0.138875
44	RAB11FIP5	-0.138275
45	ABL1	-0.137876
46	MATK	-0.137841
47	PDK3	-0.134996
48	PHKG2	-0.133844
49	PIM2	-0.131802
50	MAGI3	-0.131699
51	STK3	-0.130795
52	MAP3K11	-0.130454
53	PIM1	-0.130386
54	STK11	-0.128578
55	PRKCD	-0.128347
56	SRPK3	-0.128008
57	PKD2	-0.127822
58	TRIB1	-0.127468
59	MST1	-0.127293
60	TRIM24	-0.125834
61	GCK	-0.125637
62	AMHR2	-0.124071
63	SGK2	-0.122657
64	FGFRL1	-0.121943
65	PRKAB2	-0.121661
66	PRKD1	-0.12151
67	TPR	-0.117799
68	TIE1	-0.116527
69	MAP2K7	-0.110643
70	CAMK2D	-0.109594
71	CLK3	-0.109193
72	HUNK	-0.108731
73	SRPK2	-0.107728
74	RPS6KB2	-0.107362
75	ADCK5	-0.107061
76	PKN2	-0.106248
77	TESK1	-0.106131
78	TESK2	-0.105662
79	PPIP5K1	-0.105315
80	NUAK1	-0.104979
81	AK4	-0.104673
82	TBCK	-0.104434
83	SRM	-0.104351
84	EPHB6	-0.103077
85	EPHA2	-0.10225
86	PDK2	-0.102147
87	PAN3	-0.0995698
88	KSR1	-0.098376
89	SRC	-0.098243
90	MAP3K1	-0.0975914
91	STK31	-0.0970858
92	BRDT	-0.0968112
93	CASK	-0.0966833
94	WNK4	-0.0960052
95	RP2	-0.0956025
96	SGK494	-0.095353
97	CDK4	-0.0950966
98	IRAK4	-0.0950131
99	PRKCE	-0.0945959
100	LATS2	-0.0929157
101	FGR	-0.0913383
102	BMPR1B	-0.090994
103	CKMT2	-0.0902092
104	PRKD3	-0.0893074
105	RIPK3	-0.0889947
106	PDGFRA	-0.0887261
107	ROCK1	-0.0880299
108	TK1	-0.0874022
109	SCYL3	-0.0871616
110	MYLK	-0.0860258
111	AATK	-0.0857008
112	MAPK4	-0.0855177
113	AK5	-0.0854962
114	CDK11A	-0.0854539
115	PACSIN1	-0.0854154
116	ETNK2	-0.0850752
117	ERN1	-0.0847452
118	HCK	-0.083741
119	ERBB4	-0.0831976
120	MARK2	-0.0813703
121	DGUOK	-0.0808503
122	WEE1	-0.0801848
123	POMK	-0.0794031
124	MAPKAPK2	-0.0789562
125	MST1R	-0.0788576
126	CKS2	-0.0782074
127	RPS6KA4	-0.0768041
128	CSNK1A1L	-0.0767591
129	PIK3CB	-0.0755397
130	STK17A	-0.0752585
131	STK40	-0.0750363
132	N4BP2	-0.0748467
133	PRKAG3	-0.0737275
134	MAGI1	-0.0727307
135	MAK	-0.0727291
136	FXN	-0.0724541
137	GALK2	-0.0723642
138	EPHA8	-0.0713244
139	LYN	-0.0709541
140	ROR1	-0.0707036
141	PAPSS1	-0.0707016
142	CDK2	-0.0705367
143	CDK16	-0.070363
144	MAP3K7	-0.0701375
145	DCAKD	-0.0700603
146	MAP2K6	-0.0692246
147	ACVRL1	-0.0689671
148	CAMK1D	-0.0686509
149	EPHA3	-0.0684564
150	MYLK4	-0.0673022
151	CROT	-0.0671302
152	MAP3K15	-0.0668891
153	CDK14	-0.0668278
154	PIK3CD	-0.0664372
155	DLG3	-0.066275
156	MARK3	-0.0662095
157	MARK1	-0.0661401
158	SBK1	-0.065565
159	TAF9	-0.0649936
160	MAPK13	-0.0644987
161	PGK2	-0.0634854
162	DGKZ	-0.0633347
163	IRAK1	-0.0633093
164	IP6K3	-0.063209
165	PIP5K1A	-0.0625018
166	FASTKD2	-0.0622546
167	CAMK2A	-0.0621046
168	NEK4	-0.0619363
169	KIT	-0.0617185
170	MAST4	-0.0615992
171	PRKACB	-0.0614547
172	ROS1	-0.0609944
173	STK32A	-0.0607327
174	HK2	-0.060178
175	ADRBK1	-0.0598376
176	GK5	-0.0588939
177	PRKAR1A	-0.0580931
178	LRGUK	-0.0579716
179	PKDCC	-0.0575696
180	EPHB2	-0.0574583
181	CLK1	-0.0572877
182	MERTK	-0.0572251
183	MAP3K8	-0.0571865
184	PIP4K2A	-0.0566953
185	PRKAG1	-0.0560905
186	RPS6KA6	-0.0556096
187	PSKH2	-0.0554495
188	PIK3CG	-0.0554475
189	RIPK2	-0.0552225
190	MPP2	-0.0536527
191	MAP4K3	-0.0529989
192	DGKE	-0.0529262
193	KHK	-0.0523451
194	PRKAA2	-0.0521765
195	PI4K2A	-0.0521049
196	PINK1	-0.0518772
197	STK17B	-0.0515816
198	GK2	-0.0512357
199	PAK2	-0.0509985
200	BRD2	-0.0502559
201	ACVR2B	-0.0495245
202	NEK10	-0.049423
203	TRIM27	-0.0481616
204	MAP2K1	-0.0475216
205	PKD1	-0.0463597
206	ACVR1	-0.0460916
207	SPEG	-0.0456687
208	TTBK1	-0.0444376
209	STK39	-0.0443749
210	GSG2	-0.0443143
211	ADCK3	-0.0436913
212	TPD52L3	-0.0436245
213	PRKD2	-0.0431464
214	STRADA	-0.0428456
215	PLK3	-0.0426469
216	EPHA10	-0.0421879
217	EPHA6	-0.0419085
218	EPHB3	-0.0418559
219	PTK7	-0.0417358
220	MAP3K14	-0.0413535
221	PTK2	-0.041296
222	CLK2	-0.0408181
223	ITK	-0.0406268
224	CD2	-0.0404673
225	PGM2L1	-0.0400104
226	PRKACG	-0.0394595
227	LTK	-0.0387668
228	PLXNA4	-0.0387158
229	PRKCA	-0.0387145
230	ZAP70	-0.0385152
231	BMPR2	-0.0384955
232	MYO3B	-0.0384862
233	PRKX	-0.0382906
234	IRAK3	-0.0382239
235	TJP2	-0.0379816
236	CDK12	-0.0378841
237	TRIO	-0.037113
238	NRBP1	-0.0357884
239	TSSK4	-0.0353877
240	CDK18	-0.0351705
241	AK3	-0.0344157
242	RAF1	-0.0334421
243	ADCK2	-0.033289
244	GNE	-0.0330765
245	BMP2K	-0.033007
246	PANK3	-0.0325141
247	PCK1	-0.0324713
248	C8orf44-SGK3	-0.0324391
249	DGKA	-0.032287
250	CPNE3	-0.032006
251	MAPK6	-0.0316932
252	CHKB	-0.0308676
253	RIOK3	-0.0306816
254	EGFR	-0.0306491
255	RPS6KA5	-0.030147
256	AK9	-0.0298484
257	WNK2	-0.0298069
258	TKFC	-0.0297883
259	RBKS	-0.0294929
260	ICK	-0.0292945
261	RIPK1	-0.0291142
262	AK7	-0.0290802
263	MAP3K5	-0.0285691
264	MAPK12	-0.0283472
265	AXL	-0.0279477
266	STYK1	-0.0279464
267	AAK1	-0.0275964
268	TNIK	-0.0272158
269	TAOK3	-0.0268137
270	CKB	-0.0267334
271	XYLB	-0.0264722
272	FGGY	-0.0263253
273	NEK8	-0.026149
274	PI4KA	-0.0259912
275	CDK9	-0.0259105
276	PRPS1	-0.0256371
277	ERBB2	-0.0255372
278	NMRK1	-0.0252862
279	MAP2K5	-0.0252144
280	TYK2	-0.0249806
281	TRIB3	-0.0248414
282	BCKDK	-0.0248246
283	MAP3K6	-0.0238646
284	CHKA	-0.0237902
285	ADCK1	-0.0236947
286	PRKCB	-0.0234754
287	BUB1	-0.0231912
288	GLYCTK	-0.0230963
289	PRKCH	-0.0224683
290	PI4KB	-0.0221455
291	PRPF4B	-0.0218619
292	PLK2	-0.0215421
293	HKDC1	-0.021225
294	MEX3B	-0.0207139
295	MAP3K19	-0.0205819
296	MKNK2	-0.0199808
297	PAK3	-0.0197181
298	GK	-0.0191693
299	TAB1	-0.0191225
300	NRK	-0.0187443
301	PRKCZ	-0.0184459
302	IRAK2	-0.0182176
303	NEK5	-0.0176757
304	DCLK1	-0.0175021
305	CIB1	-0.0168273
306	STK36	-0.0163643
307	MOS	-0.0162816
308	DMPK	-0.0162186
309	CDK11B	-0.0161647
310	FER	-0.0159267
311	PDK1	-0.0157224
312	EPHA7	-0.0154287
313	PIM3	-0.0146039
314	ABCC1	-0.0145971
315	JAK3	-0.0144821
316	PNCK	-0.014021
317	FPGT-TNNI3K	-0.013886
318	CAMK4	-0.013517
319	CSNK2A1	-0.0133324
320	CDK7	-0.0129091
321	SBK2	-0.0126583
322	MPP4	-0.0122676
323	CHUK	-0.0120631
324	PRKAR1B	-0.0120482
325	CDK5R1	-0.0120116
326	CSNK1G3	-0.0118974
327	MAP4K2	-0.0117841
328	PSKH1	-0.0113897
329	RPS6KA3	-0.0110595
330	ALPK2	-0.0107874
331	MAP3K13	-0.0106132
332	PIK3R1	-0.0101897
333	DSTYK	-0.0101431
334	MAP3K10	-0.0101009
335	IDNK	-0.0100682
336	EPHA5	-0.00974954
337	MAP3K9	-0.00974627
338	PHKA1	-0.00931304
339	C17orf75	-0.00926276
340	CKMT1B	-0.00922726
341	EIF2AK3	-0.00851536
342	ACVR1C	-0.00814097
343	MAP4K1	-0.00803649
344	PAK4	-0.00801668
345	HIPK1	-0.00765139
346	MPP5	-0.00702414
347	EEF2K	-0.00685909
348	TLK1	-0.00665168
349	ACVR2A	-0.00625218
350	AKT2	-0.0061493
351	SIK3	-0.00614468
352	PRKCQ	-0.00613576
353	CIT	-0.00558761
354	PIP5KL1	-0.00505874
355	EPHA4	-0.00480696
356	GRK6	-0.00476664
357	IKBKB	-0.00429773
358	CDC42BPG	-0.00392559
359	TSSK2	-0.0039063
360	NME8	-0.00347887
361	OXSR1	-0.00324984
362	CCL2	-0.00199809
363	LRRK2	-0.00130876
364	MET	-0.00128051
365	PKN1	-0.000777803
366	MAST2	-0.00074733
367	PKN3	-0.000276848
368	JAK1	-0.000208578
369	PAPSS2	0.00041892
370	PAK6	0.00069484
371	SYK	0.00104285
372	PIK3R3	0.00172279
373	PDK4	0.0017729
374	ALDH18A1	0.00180574
375	PKLR	0.00186402
376	CSNK2A2	0.00208485
377	GRK5	0.00232878
378	PFKL	0.00253243
379	DCLK2	0.00292006
380	NTPCR	0.00325763
381	TWF1	0.00332499
382	ALPK1	0.00383197
383	MAP4K4	0.00429162
384	CERKL	0.00456282
385	TGFBR1	0.00459124
386	CSNK1G2	0.00460466
387	PRKG1	0.0046464
388	STK19	0.00474304
389	CKMT1A	0.00515394
390	NME2	0.0058384
391	RFK	0.00595508
392	RPS6KL1	0.00694435
393	IP6K1	0.00774418
394	UCK2	0.0079564
395	NEK1	0.0081768
396	MAPK14	0.00832116
397	FGFR4	0.00838354
398	VRK3	0.00847635
399	CDC42BPA	0.00863514
400	NIM1K	0.00890613
401	CSNK1G1	0.00933771
402	TYRO3	0.0094994
403	STK16	0.00956567
404	EPHB1	0.00984564
405	TEX14	0.00996897
406	ARAF	0.010499
407	MPP1	0.010947
408	VRK1	0.0112602
409	MAST1	0.0114276
410	NTRK2	0.0115042
411	MPP3	0.0115992
412	OSR1	0.0116109
413	PIP4K2B	0.0116767
414	PFKFB4	0.0119093
415	MAP3K2	0.0125309
416	PRKCG	0.0134127
417	NME3	0.0145357
418	ITPKB	0.0150431
419	MYLK2	0.0153154
420	ACVR1B	0.0157046
421	CSNK1D	0.0163323
422	PFKM	0.0168253
423	DTYMK	0.0175628
424	EIF2AK2	0.018484
425	WNK1	0.0185483
426	PKMYT1	0.0188673
427	MAPKAPK3	0.0192864
428	MORN2	0.0193644
429	GSK3B	0.0194918
430	NADK	0.0204521
431	BTK	0.0204677
432	ETNK1	0.0207423
433	CRKL	0.0211819
434	MOK	0.0213277
435	PANK2	0.0217305
436	PTK2B	0.0223148
437	MELK	0.0223168
438	HK1	0.0225869
439	TRIM33	0.022748
440	GRK4	0.0230885
441	SRMS	0.0232028
442	AK2	0.0232591
443	GSAP	0.0237412
444	PIP4K2C	0.0238357
445	BMPR1A	0.0243998
446	DGKK	0.0245543
447	PIKFYVE	0.0253989
448	ZAK	0.0256414
449	SLK	0.0260673
450	PCK2	0.0267216
451	NME4	0.0270915
452	SIK2	0.0273822
453	STK25	0.0274108
454	CDK19	0.0277432
455	CAMK1G	0.0278157
456	FN3KRP	0.0280512
457	STK10	0.0282696
458	DAPK1	0.0283088
459	CSF1R	0.0285598
460	RPS6KA2	0.0290052
461	CDK5	0.0291357
462	STK4	0.0294676
463	NEK3	0.029685
464	UHMK1	0.0307459
465	ARSG	0.0308385
466	ADRBK2	0.0323591
467	PEAK1	0.0333808
468	PIK3C2A	0.0335164
469	MPP6	0.0335178
470	CDK15	0.0337565
471	SNX16	0.0339252
472	PHKB	0.0340581
473	BMX	0.0346105
474	SGK223	0.0350695
475	MUSK	0.0355878
476	TRPM7	0.0360456
477	CDKL2	0.0364838
478	ITPKC	0.036707
479	PANK1	0.0367799
480	KSR2	0.0372923
481	DYRK4	0.0374342
482	ABL2	0.0375664
483	PIK3C3	0.0378371
484	CKM	0.0383143
485	HIPK2	0.0384606
486	FRK	0.0385028
487	PI4K2B	0.0387656
488	YES1	0.0389201
489	PLXNA3	0.038974
490	PIP5K1B	0.0394382
491	PRKG2	0.0398509
492	PDIK1L	0.0399635
493	PAK7	0.0404376
494	MAPK3	0.040772
495	SGK1	0.0415082
496	KALRN	0.0417329
497	PHKA2	0.042124
498	PTK6	0.0426558
499	MAPK8	0.0441225
500	HIPK3	0.0445718
501	CALM1	0.044796
502	BUB1B	0.0448962
503	SNRK	0.0449099
504	PRKAR2B	0.0452932
505	TEC	0.0454425
506	SLAMF6	0.0454861
507	CDC42BPB	0.045655
508	FLT3	0.0467836
509	GALK1	0.0469552
510	ALK	0.047043
511	RIPK4	0.0470547
512	EIF2AK4	0.0474277
513	MYO3A	0.0474304
514	ACTR2	0.0474802
515	FASTK	0.0475379
516	TAOK1	0.047607
517	CARD11	0.0486247
518	TNK1	0.0488154
519	STK32C	0.0492077
520	ATR	0.0493763
521	AK8	0.0496635
522	PIK3CA	0.0496927
523	HIPK4	0.0497482
524	CDKL5	0.0499774
525	MAP3K12	0.0501983
526	PLAU	0.0507033
527	FASTKD1	0.0513282
528	PDGFRB	0.0514823
529	UCKL1	0.0517944
530	SPHK2	0.0527097
531	DGKH	0.0528477
532	EPHA1	0.0529136
533	SBK3	0.0532087
534	PDPK1	0.0532718
535	DDR1	0.0542471
536	SIK1	0.0551459
537	HK3	0.0554324
538	BCR	0.055447
539	TXK	0.0559379
540	TBRG4	0.0564333
541	NPR2	0.0568272
542	SEPHS2	0.0576351
543	PFKFB2	0.0580881
544	MAPK10	0.0583502
545	EPHB4	0.0590834
546	SRPK1	0.0590938
547	FLT4	0.059137
548	NME7	0.0592715
549	FGFR2	0.0599743
550	FASTKD5	0.0604237
551	NRBP2	0.0606232
552	STK38L	0.0607171
553	PRKACA	0.0616161
554	GTF2H1	0.0618923
555	HSPB8	0.0620043
556	RYK	0.0624613
557	CDK17	0.0630306
558	BLK	0.0635893
559	AGK	0.0636016
560	NME9	0.0637401
561	STKLD1	0.0637643
562	PMVK	0.0637668
563	CLP1	0.0640962
564	PDXK	0.0641295
565	PRPS2	0.064143
566	ERN2	0.0641757
567	DGKB	0.0642746
568	IKBKE	0.0648166
569	MLKL	0.0656262
570	IPPK	0.0663403
571	TNK2	0.0663815
572	STK33	0.0665354
573	PLK5	0.0675067
574	NOL9	0.0675826
575	STK26	0.0676503
576	XRCC6BP1	0.0682037
577	PRKDC	0.0687068
578	LAMTOR3	0.0689458
579	NEK11	0.0694102
580	DDR2	0.0701634
581	LIMK1	0.0704377
582	FES	0.0718599
583	CAMKK2	0.0720199
584	ROCK2	0.0722299
585	GUK1	0.0723028
586	CMPK2	0.0729255
587	CAMK2G	0.0733746
588	TEK	0.073582
589	PPIP5K2	0.0737761
590	CIB4	0.0741433
591	TSSK1B	0.0741712
592	LMTK2	0.0744077
593	DGKQ	0.0748522
594	MINK1	0.0752383
595	AKT3	0.0752799
596	PIK3C2G	0.075319
597	ITPK1	0.0754388
598	MVK	0.0755807
599	NME5	0.0756005
600	MAST3	0.0758593
601	PBK	0.076642
602	LMTK3	0.0773838
603	CAMK1	0.077576
604	LIMK2	0.0775761
605	CDKL4	0.0783903
606	GAK	0.0786903
607	SCYL1	0.078847
608	CDKL1	0.0797098
609	PRPS1L1	0.0800538
610	PAK1	0.080773
611	SH3BP5	0.0812756
612	TPK1	0.0822433
613	NEK7	0.082262
614	GSK3A	0.0826596
615	PFKFB1	0.0829415
616	FGFR1	0.083343
617	TGFBR3	0.0842073
618	IGFN1	0.084331
619	PIP5K1C	0.0847758
620	ULK1	0.0849842
621	TGFBR2	0.0854925
622	RPS6KA1	0.0860838
623	MAPK15	0.0862699
624	PRKAG2	0.0869047
625	CAMKK1	0.0873545
626	LATS1	0.0877507
627	BRD3	0.0895375
628	SCYL2	0.089692
629	WNK3	0.089837
630	RPS6KB1	0.0902204
631	IPMK	0.0915679
632	PRKAR2A	0.0916665
633	CDKL3	0.0918889
634	CLK4	0.0919193
635	PIK3R4	0.0924448
636	TRPM6	0.0926244
637	NME1	0.0926574
638	PDGFRL	0.0931279
639	TSSK6	0.0938617
640	NUAK2	0.0941064
641	PRKCI	0.094704
642	MYT1	0.0973236
643	DGKD	0.0976419
644	TK2	0.0976583
645	MAP2K4	0.0976701
646	CAD	0.0977466
647	IP6K2	0.0991943
648	MAP3K3	0.100317
649	INSR	0.101235
650	MARK4	0.101723
651	ILK	0.102426
652	MYLK3	0.102439
653	PANK4	0.103853
654	CERK	0.105105
655	DCK	0.105894
656	NADK2	0.107002
657	SH3BP5L	0.107619
658	ULK3	0.108227
659	KDR	0.109471
660	RNASEL	0.109488
661	SGK3	0.109855
662	ERBB3	0.110282
663	MORN1	0.110361
664	CSNK1E	0.110471
665	AURKC	0.110788
666	PRKAB1	0.110979
667	CALM3	0.111178
668	CDK3	0.111244
669	PNKP	0.111759
670	FYN	0.11228
671	SHPK	0.112526
672	SPHK1	0.11301
673	ADK	0.113286
674	CDK13	0.113785
675	NLK	0.11388
676	ULK4	0.114167
677	JAK2	0.11567
678	DYRK3	0.11798
679	SH3BP4	0.119878
680	CAMKV	0.11993
681	ULK2	0.120296
682	RIOK1	0.120485
683	DCLK3	0.120969
684	UCK1	0.121536
685	DLG1	0.121698
686	NME1-NME2	0.123772
687	MAPK7	0.124411
688	TRRAP	0.12498
689	EXOSC10	0.125031
690	RET	0.125191
691	MPP7	0.127327
692	NMRK2	0.127418
693	MAP3K4	0.128264
694	TRIB2	0.128447
695	DYRK2	0.128678
696	MAPK11	0.129499
697	CSNK2B	0.130321
698	CDK20	0.131888
699	MAP2K2	0.133477
700	DAPK2	0.133502
701	WEE2	0.134832
702	TTK	0.135374
703	VRK2	0.13569
704	STRADB	0.136979
705	TLK2	0.139395
706	NME6	0.142563
707	BAZ1B	0.14414
708	BRSK2	0.14497
709	MAPK9	0.14701
710	PIK3R5	0.148063
711	EIF2AK1	0.149308
712	ALPK3	0.150169
713	STK32B	0.153072
714	FUK	0.154994
715	BRSK1	0.155867
716	CDK10	0.156019
717	DGKG	0.157038
718	NTRK1	0.157231
719	TBK1	0.157238
720	DAPK3	0.160557
721	ITPKA	0.160671
722	PIK3C2B	0.160684
723	FGFR3	0.163158
724	TAF1L	0.163513
725	COASY	0.164723
726	NEK6	0.165393
727	AK1	0.166107
728	INSRR	0.166183
729	OBSCN	0.166392
730	MAP2K3	0.167728
731	NEK2	0.167918
732	DOLK	0.168579
733	MAPK1	0.170125
734	MAPKAPK5	0.172227
735	TRIM28	0.173679
736	FASTKD3	0.178774
737	FN3K	0.184742
738	MASTL	0.187397
739	STK35	0.190986
740	CDC7	0.193827
741	GUCY2C	0.196242
742	ATM	0.196252
743	CMPK1	0.197719
744	ATMIN	0.197812
745	CKS1B	0.199007
746	HUS1	0.207126
747	DGKI	0.209569
748	PFKP	0.210095
749	RPS6KC1	0.211919
750	CHEK2	0.216423
751	NEK9	0.222314
752	PRKAA1	0.226781
753	ROR2	0.234739
754	CAMK2B	0.235521
755	BRD4	0.246109
756	GUCY2D	0.249146
757	PLK4	0.25165
758	CDK1	0.271021
759	MAP4K5	0.287093
760	TP53RK	0.308787
761	AURKB	0.32449
762	ADPGK	0.717844
